# Supplementary material for: Expression and anti-inflammatory role of activin receptor-interacting protein 2 in lipopolysaccharide-activated macrophages
Source: PubMed Central journal article supplement (PMC5583376; doi:10.1038/s41598-017-10855-4), 2017-09-04

1 **Supplementary Information**

2

3 **Expression and anti-inflammatory role of activin receptor-interacting**  
4 **protein 2 in lipopolysaccharide-activated macrophages**

5 Qian Wu<sup>1</sup>, Yan Qi<sup>1</sup>, Na Wu<sup>1</sup>, Chunhui Ma<sup>1</sup>, Wenfang Feng<sup>2</sup>, Xueling Cui<sup>2</sup>, Zhonghui  
6 Liu<sup>2</sup>

7 <sup>1</sup>Department of Immunology, College of Basic Medical Sciences, Jilin University,  
8 Changchun, China. <sup>2</sup>Department of Genetics, College of Basic Medical Sciences, Jilin  
9 University, Changchun, China

10

11 Correspondence and requests for materials should be addressed to Z.L. (email:  
12 liuzh@jlu.edu.cn) or X.C. (email: cxl@jlu.edu.cn)

13

14 **Running title:** Anti-inflammatory role of ARIP2 in macrophages

15

16

17

18

19

20

21

22

23

24

25

26 **Figure 1.** Full-length gels for ARIP2, ActRIIA and Smad3 mRNA in Raw264.7 cells  
27 examined by RT-PCR in manuscript Figure 1A. M, molecular weight (bp); lane1,  
28 GAPDH; lane2, ActRIIA; lane3, Smad3; lane4, ARIP2.

29  
30  
31  
32  
33  
34  
35  
36  
37  
38  
39  
40  
41  
42  
43  
44  
45  
46  
47  
48  
49  
50

A

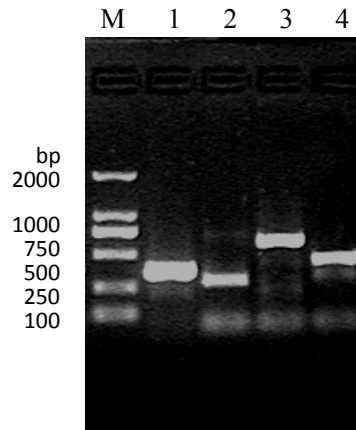

51 **Figure 2.** Full-length gels for ARIP2 expression in Raw264.7 cells. (A) Full-length  
 52 gels for ARIP2 mRNA in Raw264.7 cells treated with LPS in manuscript Figure 2A.  
 53 Lane 1, Control; Lane 2, LPS 200 ng/ml; Lane 3, LPS 500 ng/ml. (B) Full-length gels  
 54 for ARIP2 protein in Raw264.7 cells treated with LPS in manuscript Figure 2C. The  
 55 membrane of full-length gel (a) was cut into (b) size according to colorful molecular  
 56 marker of protein, and then the (b) size membrane was probed with anti-ARIP2  
 57 antibody and the labeled proteins were detected by chemiluminescence (c). M,  
 58 Colorful molecular marker of protein. Lane 1, Control; Lane 2, LPS 200 ng/ml; Lane 3,  
 59 LPS 500 ng/ml.

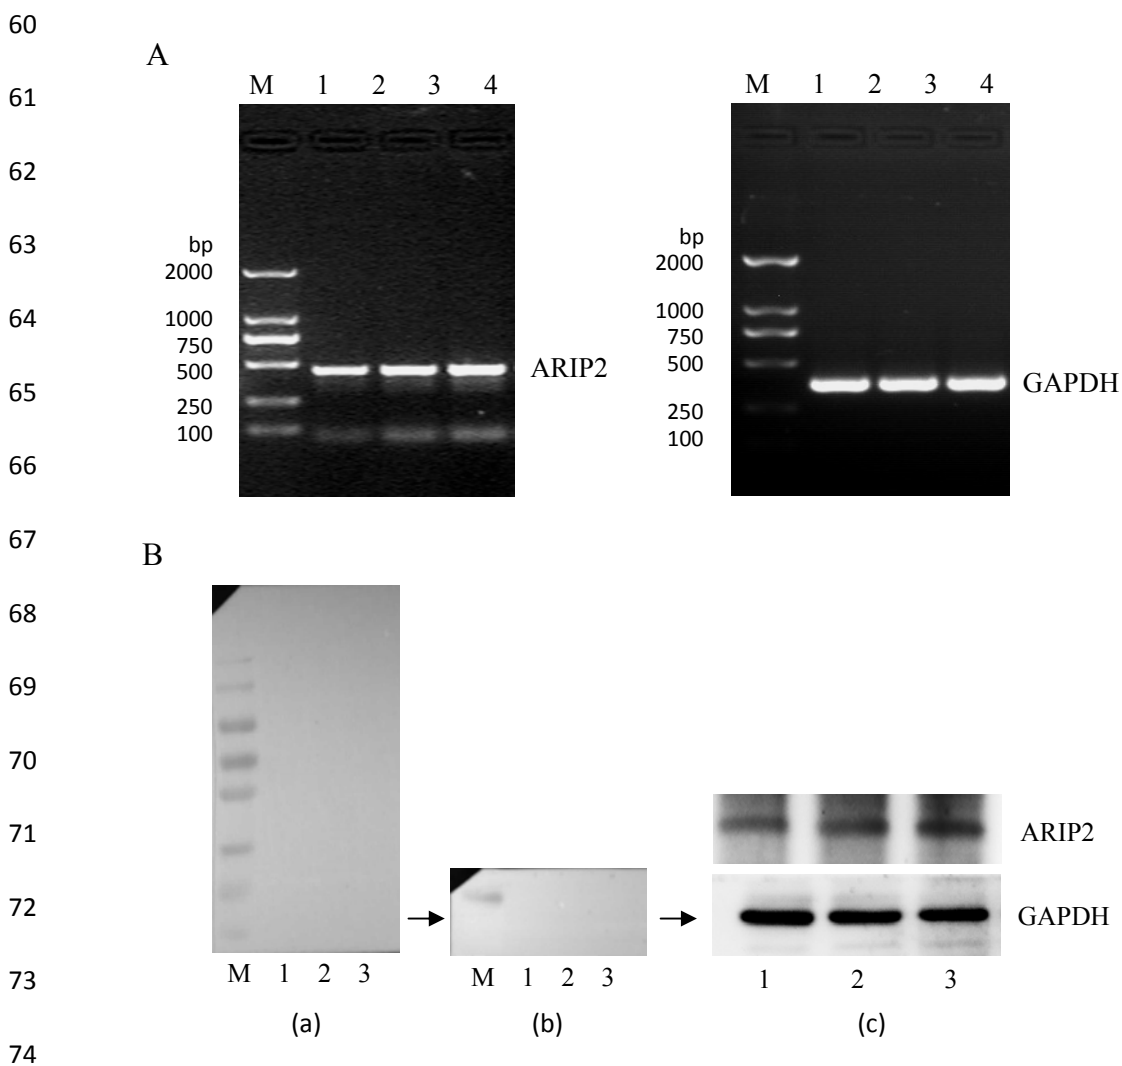

75 **Figure 3.** Full-length gels for ARIP2 mRNA in Raw264.7 cells examined by RT-PCR  
76 in manuscript Figure 3A. M, molecular weight (bp); lane1, control pcDNA3 empty  
77 plasmids; lane2, pcDNA3-ARIP2 expressing plasmids.

78

79

80

81

82

83

84

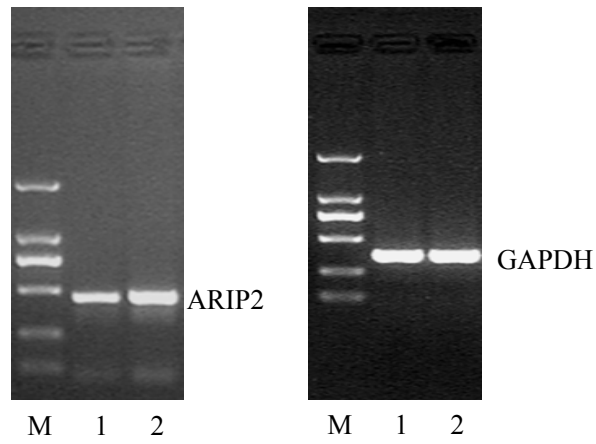

100 **Figure 4.** Full-length gels for TNF $\alpha$  and MyD88 mRNA in Raw264.7 cells examined  
101 by RT-PCR in manuscript Figure 5A. M, molecular weight (bp); lane1, control  
102 pcDNA3 empty plasmids; lane2, pcDNA3-ARIP2 expressing plasmids.

103

104

105

106

107

108

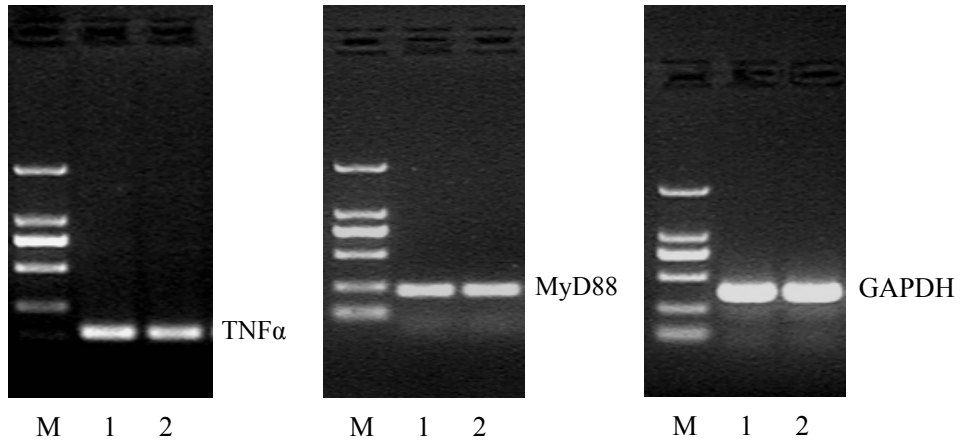

125 Figure 5. Full-length gels for ARIP2 mRNA in mouse peritoneal macrophages  
126 examined by RT-PCR in manuscript Figure 6A. M, molecular weight (bp); lane1,  
127 control pcDNA3 empty plasmids; lane2, pcDNA3-ARIP2 expressing plasmids.

128

129

130

131

132

133

134

135

136

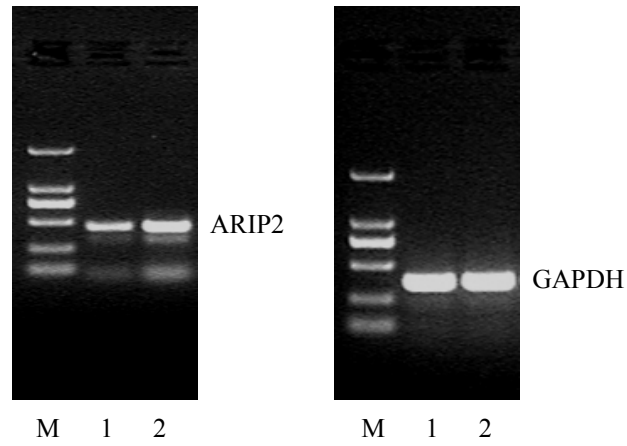

Supplement: 41598_2017_10855_MOESM1_ESM.pdf [file 41598_2017_10855_MOESM1_ESM.pdf]
